# Supplementary material for: Targeting STAT6-mediated synovial macrophage activation improves pain in experimental knee osteoarthritis
Source: PubMed Central journal article supplement (PMC10953260; doi:10.1186/s13075-024-03309-6), 2024-03-20
Supplement: 13075_2024_3309_MOESM1_ESM.pdf [file 13075_2024_3309_MOESM1_ESM.pdf]

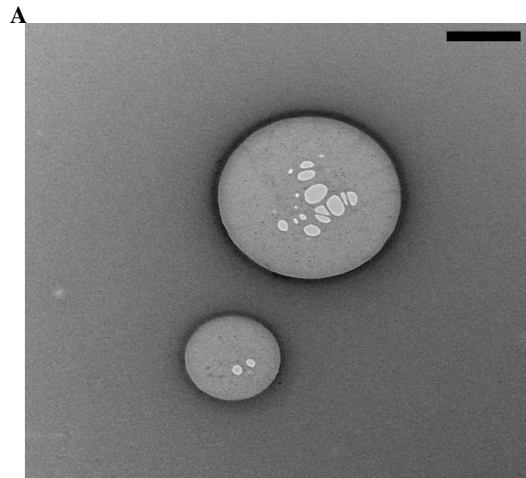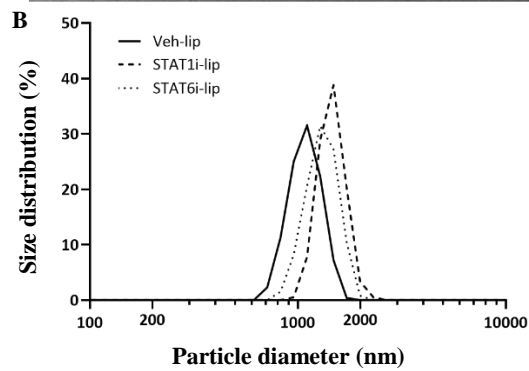

**Supplemental Fig 1. Liposome shape and size distribution.** Representative photomicrograph of prepared drug containing liposome (A). Scale bar represents 0.5  $\mu\text{m}$ . Representative dynamic light scattering results are displayed (B) with the y-axis showing volume distribution (% of total population) and x-axis the particle diameter.
