# Supplementary material for: Targeting STAT6-mediated synovial macrophage activation improves pain in experimental knee osteoarthritis
Source: PubMed Central journal article supplement (PMC10953260; doi:10.1186/s13075-024-03309-6), 2024-03-20
Supplement: 13075_2024_3309_MOESM2_ESM.pdf [file 13075_2024_3309_MOESM2_ESM.pdf]

**Supplemental table 1. Differentially expressed genes at 4-weeks.** Differentially expressed genes with an adjusted p value (padj) <0.05. Genes upregulated in OA are represented by a positive fold change (Log2FoldChange) and genes downregulated by a negative fold change.

| Row.names           | log2FoldChange | padj        | external_gene_name |
|---------------------|----------------|-------------|--------------------|
| ENSRNOG00000016163  | 1.180428996    | 2.82E-08    | Slc1a3             |
| ENSRNOG00000004067  | 0.745566281    | 7.99E-06    | Nrcam              |
| ENSRNOG00000017693  | 0.902116131    | 0.000876432 | Slc2a5             |
| ENSRNOG00000054603  | 0.970000223    | 0.000876432 | Pacsin1            |
| ENSRNOG00000014851  | 0.661965165    | 0.001037881 | Col4a4             |
| ENSRNOG00000008182  | 0.70338452     | 0.001037881 | Htra3              |
| ENSRNOG00000038132  | 0.803639935    | 0.002615602 | Vsig4              |
| ENSRNOG00000033498  | 0.405260428    | 0.004188724 | Cib1               |
| ENSRNOG00000033261  | -0.390366395   | 0.004494457 | Fam107a            |
| ENSRNOG00000008837  | -0.577310749   | 0.005753927 | Ass1               |
| ENSRNOG00000005378  | 0.486977437    | 0.007076163 | Gna15              |
| ENSRNOG00000009919  | -2.648723536   | 0.007585942 | Acod1              |
| ENSRNOG00000004494  | 0.355373947    | 0.008374958 | Lta4h              |
| ENSRNOG00000012779  | 0.632039589    | 0.01019025  | Msr1               |
| ENSRNOG00000030689  | 0.617601711    | 0.011195323 | Ms4a6b1            |
| ENSRNOG00000061524  | 0.490009107    | 0.014419012 | AABR07068285.2     |
| ENSRNOG000000051487 | 0.414310325    | 0.014419012 | Kremen1            |
| ENSRNOG00000017597  | -2.737601371   | 0.014419012 | Fbp1               |
| ENSRNOG00000015948  | -0.386477118   | 0.014419012 | Slc1a5             |
| ENSRNOG00000016164  | 0.925455677    | 0.014419012 | Fcrl2              |
| ENSRNOG00000018566  | 0.212444568    | 0.015166772 | Ctsl               |
| ENSRNOG00000047349  | 0.629392319    | 0.015166772 | AABR07006269.1     |
| ENSRNOG00000009982  | 0.19842526     | 0.015166772 | Pnp                |
| ENSRNOG00000018400  | 0.492888159    | 0.021751535 | Golm1              |
| ENSRNOG00000009341  | -0.633612016   | 0.023346679 | Hivep3             |
| ENSRNOG00000017438  | 0.86350558     | 0.023346679 | AABR07007068.1     |
| ENSRNOG00000014475  | 0.40409469     | 0.023796129 | Slc31a1            |
| ENSRNOG00000019110  | -1.745048249   | 0.027476515 | Ocstamp            |
| ENSRNOG00000013578  | 0.445099695    | 0.029400882 | Trem2              |
| ENSRNOG00000032133  | -2.169371231   | 0.029400882 | Rnase2             |
| ENSRNOG00000005679  | 0.786819688    | 0.029400882 | Fap                |
| ENSRNOG00000026807  | 0.627138755    | 0.029400882 | LOC362863          |
| ENSRNOG00000056493  | -0.691736731   | 0.029400882 | Mybpc1             |
| ENSRNOG00000037687  | 1.098177278    | 0.032049809 | Rspo2              |
| ENSRNOG00000018570  | 1.157760966    | 0.032214387 | C1qtnf3            |
| ENSRNOG00000012062  | 0.360866569    | 0.036526701 | Npc2               |
| ENSRNOG00000053332  | -1.628415334   | 0.045540302 | Cdh26              |
| ENSRNOG00000049766  | -1.747079821   | 0.045723635 | Sctr               |
| ENSRNOG00000005249  | 0.245673363    | 0.045723635 | Snx6               |

|                    |             |                    |
|--------------------|-------------|--------------------|
| ENSRNOG00000000142 | 0.317245961 | 0.045723635 Plxdc2 |
| ENSRNOG00000000855 | 0.557795078 | 0.045843032 Lst1   |
| ENSRNOG00000014603 | 0.80904359  | 0.04858025 Sgcg    |

---

**Supplemental table 2. Differentially expressed genes at 12-weeks.** Differentially expressed genes with an adjusted p value (padj) <0.05. Genes upregulated in OA are represented by a positive fold change (Log2FoldChange) and genes downregulated by a negative fold change.

| Row.names           | log2FoldChange | padj        | external_gene_name |
|---------------------|----------------|-------------|--------------------|
| ENSRNOG00000046261  | 0.890052296    | 1.11E-06    | Acp5               |
| ENSRNOG00000026302  | 0.621483643    | 3.72E-06    | Lrrn4cl            |
| ENSRNOG00000014603  | 0.999361928    | 1.30E-05    | Sgcg               |
| ENSRNOG00000008182  | 0.762441198    | 8.22E-05    | Htra3              |
| ENSRNOG00000012442  | 1.42799731     | 0.000306367 | Cemip              |
| ENSRNOG00000024998  | 0.451528157    | 0.000384099 | Trps1              |
| ENSRNOG00000006526  | 0.56583181     | 0.000384099 | Sema3c             |
| ENSRNOG00000010181  | 0.727980835    | 0.000384099 | Clec4d             |
| ENSRNOG00000016812  | 1.538124752    | 0.000814165 | Adamts16           |
| ENSRNOG00000017842  | -0.961721711   | 0.001042466 | Scnn1g             |
| ENSRNOG00000054204  | -0.566585949   | 0.001042466 | Gria2              |
| ENSRNOG00000000700  | 0.830366968    | 0.001042466 | Tmem119            |
| ENSRNOG00000000811  | 0.766698419    | 0.001464273 | Pkib               |
| ENSRNOG000000048924 | 0.73032045     | 0.001716486 | Islr               |
| ENSRNOG00000013269  | -0.461252983   | 0.00235593  | Tnfsf10            |
| ENSRNOG00000018570  | 1.491432586    | 0.002378731 | C1qtnf3            |
| ENSRNOG00000004783  | 0.748665156    | 0.00255907  | Fam171b            |
| ENSRNOG00000023303  | -0.493034271   | 0.002560881 | Dpep2              |
| ENSRNOG00000005931  | 0.505377634    | 0.002786547 | Cpq                |
| ENSRNOG00000007866  | 1.262693056    | 0.003122938 | Clec2dl1           |
| ENSRNOG00000005277  | 1.321259015    | 0.003122938 | Ptprv              |
| ENSRNOG00000009892  | -0.580610529   | 0.00376258  | Adamts15           |
| ENSRNOG00000016372  | -0.282071876   | 0.003915687 | Slc12a7            |
| ENSRNOG00000002372  | 0.874055931    | 0.004285156 | Sgcd               |
| ENSRNOG00000004067  | 0.630925222    | 0.004349213 | Nrcam              |
| ENSRNOG00000016968  | -0.351973032   | 0.00457206  | Gramd4             |
| ENSRNOG00000010977  | 0.692385055    | 0.00457206  | Igfbp6             |
| ENSRNOG00000017786  | 0.834954167    | 0.004631346 | Acta1              |
| ENSRNOG00000007461  | 0.633547014    | 0.006052383 | Klhl41             |
| ENSRNOG00000027936  | 0.78188318     | 0.006141339 | Ccdc8              |
| ENSRNOG00000030210  | 0.730591683    | 0.006371413 | Fndc1              |
| ENSRNOG00000006548  | 0.692459913    | 0.006502247 | Mrc2               |
| ENSRNOG00000010918  | 0.401409229    | 0.007540242 | Cebpa              |
| ENSRNOG00000009972  | -0.267587962   | 0.008098586 | Rara               |
| ENSRNOG00000002345  | 0.460519623    | 0.008098586 | Rasgef1b           |
| ENSRNOG00000005708  | 1.310923614    | 0.008974323 | Mmp16              |
| ENSRNOG00000008680  | 0.600455103    | 0.009054238 | Lox11              |
| ENSRNOG000000022710 | 0.722509356    | 0.009385557 | Prrg4              |
| ENSRNOG00000005679  | 0.824225794    | 0.009519663 | Fap                |

|                     |              |                          |
|---------------------|--------------|--------------------------|
| ENSRNOG00000004583  | 0.983260413  | 0.009647513 Mb           |
| ENSRNOG000000051688 | -0.502607515 | 0.010264192 Syt15        |
| ENSRNOG000000030763 | -0.638481422 | 0.011868307 Dpp4         |
| ENSRNOG00000012681  | -0.461006623 | 0.011868307 Lgals9       |
| ENSRNOG00000018669  | -0.450891881 | 0.011868307 Jak3         |
| ENSRNOG00000014398  | 0.607866224  | 0.011868307 Scara5       |
| ENSRNOG00000023812  | 0.965379606  | 0.011868307 Raver2       |
| ENSRNOG00000010079  | 0.994431206  | 0.011868307 Ca3          |
| ENSRNOG00000006052  | 0.507512071  | 0.011908438 Sulf2        |
| ENSRNOG00000046494  | 1.488478451  | 0.012830497 LOC100361018 |
| ENSRNOG00000009822  | 0.388653991  | 0.013189148 Tlr2         |
| ENSRNOG00000021155  | 0.57562951   | 0.013189148 Ctsk         |
| ENSRNOG00000030981  | -0.521647457 | 0.014877556 Scnn1b       |
| ENSRNOG000000053201 | -0.398984485 | 0.014877556 Gpcpd1       |
| ENSRNOG00000007545  | -0.817073782 | 0.015648813 Angptl4      |
| ENSRNOG00000013631  | 0.329871237  | 0.015648813 Slc31a2      |
| ENSRNOG00000010666  | 0.884469294  | 0.015648813 Ccn5         |
| ENSRNOG000000032297 | 0.323017785  | 0.016622334 Msmo1        |
| ENSRNOG00000024620  | 0.562246532  | 0.016843063 Mamdc2       |
| ENSRNOG00000018509  | 0.803547745  | 0.016843063 Cx3cr1       |
| ENSRNOG000000033496 | 0.901376684  | 0.016843063 Igdcc4       |
| ENSRNOG000000058329 | 0.911675704  | 0.016843063 Prrx2        |
| ENSRNOG00000009079  | -0.495296703 | 0.017365334 Prkar2b      |
| ENSRNOG00000004400  | -0.773219157 | 0.018797022 Avpr1a       |
| ENSRNOG00000006787  | 0.350201837  | 0.018797022 Dhcr24       |
| ENSRNOG00000000902  | 0.363357584  | 0.018797022 Hsph1        |
| ENSRNOG000000049471 | 0.466777684  | 0.018797022 Steap3       |
| ENSRNOG00000014166  | 0.758474523  | 0.018797022 Smoc2        |
| ENSRNOG00000009343  | 1.191133669  | 0.018797022 Evpl         |
| ENSRNOG00000043219  | 1.508025779  | 0.018871909 Fbn2         |
| ENSRNOG000000047545 | -0.570738111 | 0.019397831 Adra2a       |
| ENSRNOG00000004672  | -0.353325583 | 0.019397831 Sec14l2      |
| ENSRNOG00000008749  | 0.5100935    | 0.019397831 Col5a1       |
| ENSRNOG00000012196  | 0.740907822  | 0.019397831 Asah2        |
| ENSRNOG00000020743  | 0.821799203  | 0.019397831 Cyp2s1       |
| ENSRNOG00000049491  | 1.631670496  | 0.019566261 RT1-DMb      |
| ENSRNOG000000057855 | 0.452330651  | 0.020988374 F5           |
| ENSRNOG00000049994  | -0.619010451 | 0.021769497 Ifi44l       |
| ENSRNOG000000037838 | 0.563778448  | 0.023524739 RGD1560455   |
| ENSRNOG000000039759 | 0.578150836  | 0.023524739 Gpr34        |
| ENSRNOG00000000563  | 0.897097058  | 0.023524739 Adamts14     |
| ENSRNOG00000016983  | 1.063372471  | 0.023524739 Myh7         |
| ENSRNOG00000015972  | 1.292122146  | 0.024079731 Ano5         |
| ENSRNOG00000008478  | 3.33248879   | 0.025744708 Mmp13        |

|                     |              |                        |
|---------------------|--------------|------------------------|
| ENSRNOG00000050996  | 0.648347864  | 0.026128682 Kctd4      |
| ENSRNOG00000034139  | 0.746484637  | 0.026128682 Lyc2       |
| ENSRNOG00000014243  | -0.349182886 | 0.02686541 Pear1       |
| ENSRNOG00000013312  | 0.508594673  | 0.027085163 Kcnt2      |
| ENSRNOG00000014505  | -0.768625373 | 0.027244864 Pmfbp1     |
| ENSRNOG00000004712  | 0.782565835  | 0.027250161 Angptl1    |
| ENSRNOG00000004706  | 1.047587761  | 0.027821961 Vit        |
| ENSRNOG000000061394 | 0.555255558  | 0.028158956 Clec4e     |
| ENSRNOG00000017819  | 0.371624718  | 0.028312868 Cd14       |
| ENSRNOG00000007036  | 0.517639602  | 0.028312868 Tgfbr1     |
| ENSRNOG00000059507  | -0.728965502 | 0.028512068 Lamc3      |
| ENSRNOG00000008351  | -0.476449962 | 0.029518787 RGD1308117 |
| ENSRNOG00000019141  | -0.452501871 | 0.030827837 Ch25h      |
| ENSRNOG00000000653  | -0.649222819 | 0.032074036 Nr5a2      |
| ENSRNOG00000007918  | 0.587311781  | 0.032074036 Tbxas1     |
| ENSRNOG00000015505  | 0.755290855  | 0.032074036 Mfap5      |
| ENSRNOG00000007286  | -0.441207605 | 0.033802817 Mdm1       |
| ENSRNOG00000052880  | -0.593995077 | 0.034327848 Prph       |
| ENSRNOG00000034258  | 0.905499984  | 0.034327848 Xirp2      |
| ENSRNOG00000007567  | -0.429052156 | 0.034650884 Rem1       |
| ENSRNOG00000003229  | -0.366534807 | 0.034650884 Tspan7     |
| ENSRNOG00000011659  | 0.662982576  | 0.035201619 Alpk3      |
| ENSRNOG000000061845 | -0.548642643 | 0.035251113 Ctnnbp2    |
| ENSRNOG00000004273  | -0.353401237 | 0.036880784 Ifitm1     |
| ENSRNOG000000023148 | 0.839783456  | 0.037194877 Col11a1    |
| ENSRNOG00000019757  | -0.879158155 | 0.03860483 Dpep3       |
| ENSRNOG00000039278  | 0.909031651  | 0.03860483 Mcart1      |
| ENSRNOG00000043167  | 0.341170162  | 0.038812981 Itga9      |
| ENSRNOG00000006867  | 0.37704266   | 0.038812981 Etv1       |
| ENSRNOG00000054251  | 0.630452687  | 0.038907975 Clec7a     |
| ENSRNOG00000009073  | 1.093680463  | 0.038907975 Tnni1      |
| ENSRNOG00000025245  | 0.490228618  | 0.040783376 RGD1311946 |
| ENSRNOG00000013663  | 0.689243577  | 0.042481784 Tmem86a    |
| ENSRNOG00000014117  | -0.341674826 | 0.042576729 Hmox1      |
| ENSRNOG00000006859  | 0.365525243  | 0.042576729 Insig1     |
| ENSRNOG00000017459  | 0.631539588  | 0.042576729 C1ql3      |
| ENSRNOG00000002434  | 0.720128473  | 0.042576729 Tmem100    |
| ENSRNOG00000032994  | 0.852028342  | 0.042576729 Myom3      |
| ENSRNOG00000013179  | -0.412391059 | 0.043321885 Tinagl1    |
| ENSRNOG00000056118  | -0.319453441 | 0.043321885 Cic        |
| ENSRNOG00000038202  | 0.462908035  | 0.043515363 Calml4     |
| ENSRNOG00000026604  | 0.522008395  | 0.043515363 Cercam     |
| ENSRNOG00000022256  | -0.537374547 | 0.043998835 Cxcl10     |
| ENSRNOG00000013578  | 0.555124503  | 0.044615422 Trem2      |

|                    |              |             |        |
|--------------------|--------------|-------------|--------|
| ENSRNOG00000005592 | 0.581016282  | 0.044829054 | Brinp2 |
| ENSRNOG00000022597 | -0.390437232 | 0.045006764 | Cenpj  |
| ENSRNOG00000019556 | 0.502988502  | 0.045006764 | Cd9    |
| ENSRNOG00000008622 | 0.542822201  | 0.045006764 | Creb5  |
| ENSRNOG00000013967 | 0.504059827  | 0.047724369 | Blnk   |
| ENSRNOG00000021521 | -3.801777205 | 0.050067516 | Chst5  |

---

**Supplemental table 3. GSEA report for GO at 4-week.** Gene sets positively enriched in PTOA from the Gene Ontology database at 4-weeks.

| NAME                                                                                           | NES       | NOM p-val   | FDR q-val   |
|------------------------------------------------------------------------------------------------|-----------|-------------|-------------|
| GOBP_ANTIGEN_PROCESSING_AND_PRESENTATION_OF_PEPTIDE_OR_POLYSACCHARIDE_ANTIGEN_VIA_MHC_CLASS_II | 2.527666  | 0           | 0.006856685 |
| GOBP_NUCLEOTIDE_SUGAR_METABOLIC_PROCESS                                                        | 2.468147  | 0           | 0.005145371 |
| GOBP_VESICLE_MEDIATED_TRANSPORT_BETWEEN_ENDOSOMAL_COMPARTMENTS                                 | 2.4302742 | 0           | 0.006869598 |
| GOBP_PROTEIN_LOCALIZATION_TO_ENDOPLASMIC_RETICULUM                                             | 2.4022214 | 0           | 0.005152199 |
| GOBP_ESTABLISHMENT_OF_PROTEIN_LOCALIZATION_TO_ENDOPLASMIC_RETICULUM                            | 2.3398695 | 0           | 0.009028094 |
| GOBP_COTRANSLATIONAL_PROTEIN_TARGETING_TO_MEMBRANE                                             | 2.3228097 | 0           | 0.01155867  |
| GOBP_POST_GOLGI_VESICLE_MEDIATED_TRANSPORT                                                     | 2.304336  | 0           | 0.013865072 |
| GOCC_MITOTIC_SPINDLE_POLE                                                                      | 2.2978964 | 0           | 0.012959702 |
| GOBP_COLLAGEN_FIBRIL_ORGANIZATION                                                              | 2.2952921 | 0           | 0.011519736 |
| GOCC_COPI_COATED_VESICLE                                                                       | 2.2122838 | 0           | 0.02528621  |
| GOMF_EXTRACELLULAR_MATRIX_STRUCTURAL_CONSTITUENT_CONFERRING_COMPRESSION_RESISTANCE             | 2.202142  | 0           | 0.025801998 |
| GOBP_AUTOPHAGY_OF_MITOCHONDRION                                                                | 2.1820586 | 0           | 0.029995421 |
| GOBP_VACUOLE_ORGANIZATION                                                                      | 2.1803434 | 0           | 0.02768808  |
| GOBP_REGULATION_OF_AUTOPHAGY_OF_MITOCHONDRION                                                  | 2.1777034 | 0           | 0.02692886  |
| GOBP_ANTIGEN_PROCESSING_AND_PRESENTATION_OF_EXOGENOUS_PEPTIDE_ANTIGEN_VIA_MHC_CLASS_II         | 2.1706033 | 0           | 0.028117338 |
| GOBP_CYTOSOLIC_TRANSPORT                                                                       | 2.1526976 | 0           | 0.031778224 |
| GOBP_NUCLEOTIDE_SUGAR_BIOSYNTHETIC_PROCESS                                                     | 2.1395595 | 0           | 0.03397925  |
| GOBP_PROTEIN_QUALITY_CONTROL_FOR_MISFOLDED_OR_INCOMPLETELY_SYNTHESIZED_PROTEINS                | 2.1369963 | 0           | 0.032862827 |
| GOCC_SITE_OF_DOUBLE_STRAND_BREAK                                                               | 2.1286125 | 0           | 0.03311641  |
| GOBP_SRP_DEPENDENT_COTRANSLATIONAL_PROTEIN_TARGETING_TO_MEMBRANE                               | 2.1202404 | 0           | 0.035254776 |
| GOCC_CIS_GOLGI_NETWORK                                                                         | 2.1195056 | 0           | 0.034069378 |
| GOCC_SPECIFIC_GRANULE_MEMBRANE                                                                 | 2.1105418 | 0           | 0.034882184 |
| GOBP_LYTIC_VACUOLE_ORGANIZATION                                                                | 2.1069336 | 0           | 0.035458162 |
| GOCC_GOLGI_STACK                                                                               | 2.106341  | 0           | 0.034124304 |
| GOBP_REGULATION_OF_EARLY_ENDOSOME_TO_LATE_ENDOSOME_TRANSPORT                                   | 2.1035776 | 0           | 0.03331029  |
| GOBP_PROTEIN_LOCALIZATION_TO_CILIARY_MEMBRANE                                                  | 2.098182  | 0           | 0.034179416 |
| GOBP_GOLGI_TO_ENDOSOME_TRANSPORT                                                               | 2.091858  | 0.005128205 | 0.03472157  |
| GOMF_PRENYLTRANSFERASE_ACTIVITY                                                                | 2.0665827 | 0           | 0.040544823 |
| GOBP_PROTEIN_LOCALIZATION_TO_MICROTUBULE_ORGANIZING_CENTER                                     | 2.0622885 | 0           | 0.04121025  |
| GOCC_DYSTROPHIN_ASSOCIATED_GLYCOPROTEIN_COMPLEX                                                | 2.054218  | 0.004854369 | 0.042858638 |
| GOBP_REGULATION_OF_PHOSPHOLIPID_BIOSYNTHETIC_PROCESS                                           | 2.0388882 | 0           | 0.04750668  |
| GOBP_ORGANELLE_DISASSEMBLY                                                                     | 2.0355656 | 0           | 0.046778537 |
| GOBP_PROTEIN_EXIT_FROM_ENDOPLASMIC_RETICULUM                                                   | 2.0342562 | 0           | 0.045675196 |
| GOBP_ANTIGEN_PROCESSING_AND_PRESENTATION_OF_PEPTIDE_ANTIGEN                                    | 2.032697  | 0           | 0.044633698 |
| GOBP_ANTIGEN_PROCESSING_AND_PRESENTATION_OF_EXOGENOUS_PEPTIDE_ANTIGEN                          | 2.0310414 | 0           | 0.04376037  |
| GOMF_PHOSPHATIDYLINOSITOL_MONOPHOSPHATE_PHOSPHATASE_ACTIVITY                                   | 2.0295067 | 0.004901961 | 0.043026023 |
| GOBP_REGULATION_OF_ERYTHROCYTE_DIFFERENTIATION                                                 | 2.0259774 | 0           | 0.0430956   |
| GOBP_AMINO_SUGAR_METABOLIC_PROCESS                                                             | 2.0242229 | 0           | 0.042323843 |
| GOCC_COPI_COATED_VESICLE_MEMBRANE                                                              | 2.0200748 | 0           | 0.04320737  |
| GOCC_SPECIFIC_GRANULE                                                                          | 2.0038197 | 0           | 0.048485585 |
| GOBP_PROTEIN_N_LINKED_GLYCOSYLATION                                                            | 1.9997069 | 0           | 0.04856924  |
| GOBP_ENDOPLASMIC_RETICULUM_TO_GOLGI_VESICLE_MEDIATED_TRANSPORT                                 | 1.9960654 | 0           | 0.048977233 |
| GOBP_PROTEIN_LOCALIZATION_TO_CYTOSKELETON                                                      | 1.9926087 | 0           | 0.049449492 |
| GOBP_PROTEIN_DEGLYCOSYLATION                                                                   | 1.9904077 | 0.005780347 | 0.048943087 |
| GOBP_MYELIN_ASSEMBLY                                                                           | 1.9891163 | 0.005291005 | 0.04833131  |
| GOBP_POSITIVE_REGULATION_OF_GLYCOPROTEIN_METABOLIC_PROCESS                                     | 1.9876896 | 0           | 0.047952738 |

**Supplemental table 4. GSEA report for GO at 12-week.** Gene sets positively enriched in PTOA from the Gene Ontology database at 12-weeks.

| Name                                                                                           | NES  | NOM p-val | FDR q-val |
|------------------------------------------------------------------------------------------------|------|-----------|-----------|
| GOBP_COLLAGEN_CATABOLIC_PROCESS                                                                | 2.19 | 0         | 0.002     |
| GOCC_COMPLEX_OF_COLLAGEN_TRIMERS                                                               | 2.1  | 0         | 0.011     |
| GOMF_ELECTRON_TRANSFER_ACTIVITY                                                                | 2.03 | 0         | 0.034     |
| GOMF_OXIDOREDUCTION_DRIVEN_ACTIVE_TRANSMEMBRANE_TRANSPORTER_ACTIVITY                           | 2.02 | 0         | 0.028     |
| GOMF_EXTRACELLULAR_MATRIX_STRUCTURAL_CONSTITUENT_CONFERRING_TENSILE_STRENGTH                   | 2.02 | 0         | 0.022     |
| GOMF_COLLAGEN_BINDING                                                                          | 1.98 | 0         | 0.036     |
| GOBP TRABECULA FORMATION                                                                       | 1.98 | 0         | 0.036     |
| GOCC_COLLAGEN_TRIMER                                                                           | 1.97 | 0         | 0.036     |
| GOMF_FIBRONECTIN_BINDING                                                                       | 1.95 | 0         | 0.041     |
| GOMF_EXTRACELLULAR_MATRIX_STRUCTURAL_CONSTITUENT                                               | 1.95 | 0         | 0.041     |
| GOCC_A_BAND                                                                                    | 1.94 | 0         | 0.044     |
| GOMF_PROTON_TRANSMEMBRANE_TRANSPORTER_ACTIVITY                                                 | 1.92 | 0         | 0.05      |
| GOCC_RESPIRASOME                                                                               | 1.92 | 0         | 0.047     |
| GOBP_EXTERNAL_ENCAPSULATING_STRUCTURE_ORGANIZATION                                             | 1.92 | 0         | 0.045     |
| GOBP_ANTIGEN_PROCESSING_AND_PRESENTATION_OF_PEPTIDE_OR_POLYSACCHARIDE_ANTIGEN_VIA_MHC_CLASS_II | 1.91 | 0         | 0.048     |



**Supplemental table 5. GSEA report for Hallmark at 4-week.** Gene sets positively enriched in PTOA from the Hallmark database at 4-weeks.

| NAME                                       | NES       | NOM p-val   | FDR q-val   |
|--------------------------------------------|-----------|-------------|-------------|
| HALLMARK_PROTEIN_SECRETION                 | 2.7417886 | 0           | 0           |
| HALLMARK_TGF_BETA_SIGNALING                | 2.3160634 | 0           | 0           |
| HALLMARK_EPITHELIAL_MESENCHYMAL_TRANSITION | 2.2345629 | 0           | 0           |
| HALLMARK_MITOTIC_SPINDLE                   | 2.1072602 | 0           | 0           |
| HALLMARK_OXIDATIVE_PHOSPHORYLATION         | 1.9979291 | 0           | 0.001599587 |
| HALLMARK_MTORC1_SIGNALING                  | 1.9896821 | 0           | 0.001332989 |
| HALLMARK_G2M_CHECKPOINT                    | 1.8814024 | 0           | 0.00647452  |
| HALLMARK_UNFOLDED_PROTEIN_RESPONSE         | 1.7856348 | 0           | 0.00866443  |
| HALLMARK_ANGIOGENESIS                      | 1.6482159 | 0.016129032 | 0.014726359 |
| HALLMARK_DNA_REPAIR                        | 1.6304616 | 0           | 0.013786918 |
| HALLMARK_MYC_TARGETS_V1                    | 1.6286215 | 0           | 0.012533561 |
| HALLMARK_GLYCOLYSIS                        | 1.5741733 | 0           | 0.018020747 |
| HALLMARK_ANDROGEN_RESPONSE                 | 1.5708091 | 0           | 0.01786499  |
| HALLMARK_UV_RESPONSE_DN                    | 1.5558542 | 0           | 0.0171602   |
| HALLMARK_INFLAMMATORY_RESPONSE             | 1.4775454 | 0           | 0.026116434 |
| HALLMARK_E2F_TARGETS                       | 1.4163634 | 0           | 0.038666215 |

**Supplemental table 6. Individual linear mixed effects models, PAM.** Individual linear mixed effects modelling of pressure pain threshold in Veh-lip (A), Clod-lip (B), STAT1i-lip (C), and STAT6i-lip (D).

**A**  
Model 1 PAM Veh-lip

| <i>Fixed Effects</i> |                     |                |                          |
|----------------------|---------------------|----------------|--------------------------|
| Variable             | $\beta$ coefficient | Standard Error | 95% Confidence Intervals |
| <b>Time (weeks)</b>  |                     |                |                          |
| 0                    | Reference           | Reference      | Reference                |
| 4                    | <b>-70.57</b>       | <b>16.23</b>   | <b>-102.37 to -38.77</b> |
| 8                    | <b>36.42</b>        | <b>16.23</b>   | <b>4.62 to 68.22</b>     |
| 12                   | 0.37                | 16.23          | -31.43 to 32.17          |
| <b>Intercept</b>     | 434.52              | 11.47          | 412.03 to 457.01         |
| <i>Random Effect</i> |                     |                |                          |
| Variable             | Variance            | Standard Error | 95% Confidence Intervals |
| Intercept            | 1316.24             | 310.24         | 829.29 to 2089.13        |

**B**  
Model 2 PAM Clod-lip

| <i>Fixed Effects</i> |                     |                |                          |
|----------------------|---------------------|----------------|--------------------------|
| Variable             | $\beta$ coefficient | Standard Error | 95% Confidence Intervals |
| <b>Time (weeks)</b>  |                     |                |                          |
| 0                    | Reference           | Reference      | Reference                |
| 4                    | 42.18               | 23.19          | -3.27 to 87.63           |
| 8                    | 36.81               | 23.19          | -8.64 to 82.26           |
| 12                   | <b>123.32</b>       | <b>23.19</b>   | <b>77.87 to 168.77</b>   |
| <b>Intercept</b>     | 406.92              | 16.40          | 374.78 to 439.06         |
| <i>Random Effect</i> |                     |                |                          |
| Variable             | Variance            | Standard Error | 95% Confidence Intervals |
| Intercept            | 2688.65             | 633.72         | 1693.96 to 4267.42       |

**C**  
Model 3 PAM STAT1i-lip

| <i>Fixed Effects</i> |                     |                |                          |
|----------------------|---------------------|----------------|--------------------------|
| Variable             | $\beta$ coefficient | Standard Error | 95% Confidence Intervals |
| <b>Time (weeks)</b>  |                     |                |                          |
| 0                    | Reference           | Reference      | Reference                |
| 4                    | <b>-96.64</b>       | <b>25.28</b>   | <b>-146.19 to -47.09</b> |
| 8                    | -32.44              | 25.28          | -81.99 to 17.11          |
| 12                   | -22.84              | 25.28          | -72.39 to 26.71          |
| <b>Intercept</b>     | 480.18              | 17.88          | 445.14 to 515.22         |
| <i>Random Effect</i> |                     |                |                          |
| Variable             | Variance            | Standard Error | 95% Confidence Intervals |
| Intercept            | 3196.11             | 753.33         | 2013.68 to 5072.85       |

**D**  
Model 4 PAM STAT6i-lip

| <i>Fixed Effects</i> |                     |                |                          |
|----------------------|---------------------|----------------|--------------------------|
| Variable             | $\beta$ coefficient | Standard Error | 95% Confidence Intervals |
| <b>Time (weeks)</b>  |                     |                |                          |
| 0                    | Reference           | Reference      | Reference                |
| 4                    | <b>67.86</b>        | <b>21.17</b>   | <b>26.38 to 109.34</b>   |
| 8                    | <b>153.85</b>       | <b>21.17</b>   | <b>112.37 to 195.33</b>  |
| 12                   | <b>73.97</b>        | <b>21.17</b>   | <b>32.49 to 115.45</b>   |
| <b>Intercept</b>     | 380.6               | 14.97          | 351.27 to 409.93         |
| <i>Random Effect</i> |                     |                |                          |
| Variable             | Variance            | Standard Error | 95% Confidence Intervals |
| Intercept            | 2239.98             | 527.97         | 1411.28 to 3555.28       |

**Supplemental table 7. Linear mixed effects model with pairwise comparisons, PAM.**

Model 5: PAM

| <i>Fixed Effects</i>                                                 |                                       |                       |                                 |
|----------------------------------------------------------------------|---------------------------------------|-----------------------|---------------------------------|
| <b>Variable</b>                                                      | <b><math>\beta</math> coefficient</b> | <b>Standard Error</b> | <b>95% Confidence Intervals</b> |
| <b>Treatment</b>                                                     |                                       |                       |                                 |
| Veh-Lip                                                              | Reference                             | Reference             | Reference                       |
| Clod-Lip                                                             | -27.60                                | 21.72                 | -70.18 to 14.98                 |
| Stat1i-Lip                                                           | <b>45.66</b>                          | <b>21.72</b>          | <b>3.08 to 88.24</b>            |
| Stat6i-Lip                                                           | <b>-53.92</b>                         | <b>21.72</b>          | <b>-96.50 to -11.34</b>         |
| <b>Time (weeks)</b>                                                  |                                       |                       |                                 |
| 0                                                                    | Reference                             | Reference             | Reference                       |
| 4                                                                    | <b>-70.57</b>                         | <b>22.42</b>          | <b>-114.52 to -26.62</b>        |
| 8                                                                    | 36.42                                 | 22.42                 | -7.53 to 80.37                  |
| 12                                                                   | 0.37                                  | 22.42                 | -43.58 to 44.32                 |
| <b>Treatment x Time</b>                                              |                                       |                       |                                 |
| Clod-Lip (4wk)                                                       | <b>112.75</b>                         | <b>31.71</b>          | <b>50.60 to 174.90</b>          |
| Clod-Lip (8wk)                                                       | 0.39                                  | 31.71                 | -61.76 to 62.54                 |
| Clod-Lip (12wk)                                                      | <b>122.95</b>                         | <b>31.71</b>          | <b>60.80 to 185.10</b>          |
| Stat1i-Lip (4wk)                                                     | -26.07                                | 31.71                 | -88.22 to 36.08                 |
| Stat1i-Lip (8wk)                                                     | <b>-68.86</b>                         | <b>31.71</b>          | <b>-131.01 to -6.71</b>         |
| Stat1i-Lip (12wk)                                                    | -23.21                                | 31.71                 | -85.36 to 38.94                 |
| Stat6i-Lip (4wk)                                                     | <b>138.43</b>                         | <b>31.71</b>          | <b>76.28 to 200.58</b>          |
| Stat6i-Lip (8wk)                                                     | <b>117.43</b>                         | <b>31.71</b>          | <b>55.28 to 179.58</b>          |
| Stat6i-Lip (12wk)                                                    | <b>73.60</b>                          | <b>31.71</b>          | <b>11.45 to 135.75</b>          |
| <b>Intercept</b>                                                     | 434.52                                | 15.36                 | 404.41 to 464.63                |
| <i>Random Effects</i>                                                |                                       |                       |                                 |
| <b>Variable</b>                                                      | <b>Variance</b>                       | <b>Standard Error</b> | <b>95% Confidence Intervals</b> |
| Intercept (all)                                                      | 2360.24                               | 279.92                | 1870.71 to 2977.88              |
| Intercept (by group)                                                 | -153.50                               | 140.87                | -429.61 to 122.60               |
| Exchangeable covariance matrix used to control for repeated measures |                                       |                       |                                 |

**Supplemental table 8. Individual linear mixed effects models, eVF.** Individual linear mixed effects modelling of hind paw withdrawal threshold in Veh-lip (A), Clod-lip (B), STAT1i-lip (C), and STAT6i-lip (D).

| <b>A</b>               |                     |                |                          |
|------------------------|---------------------|----------------|--------------------------|
| Model 6 eVF Veh-lip    |                     |                |                          |
| <i>Fixed Effects</i>   |                     |                |                          |
| Variable               | $\beta$ coefficient | Standard Error | 95% Confidence Intervals |
| <b>Time (weeks)</b>    |                     |                |                          |
| 0                      | Reference           | Reference      | Reference                |
| 4                      | <b>-9.18</b>        | <b>4.08</b>    | <b>-17.18 to -1.18</b>   |
| 8                      | <b>-8.23</b>        | <b>4.08</b>    | <b>-16.23 to -0.22</b>   |
| 12                     | <b>-12.93</b>       | <b>4.08</b>    | <b>-20.93 to -4.93</b>   |
| <b>Intercept</b>       | 79.91               | 3.12           | 73.80 to 86.02           |
| <i>Random Effect</i>   |                     |                |                          |
| Variable               | Variance            | Standard Error | 95% Confidence Intervals |
| Intercept              | 83.32               | 22.68          | 48.88 to 142.04          |
| <b>B</b>               |                     |                |                          |
| Model 7 eVF Clod-lip   |                     |                |                          |
| <i>Fixed Effects</i>   |                     |                |                          |
| Variable               | $\beta$ coefficient | Standard Error | 95% Confidence Intervals |
| <b>Time (weeks)</b>    |                     |                |                          |
| 0                      | Reference           | Reference      | Reference                |
| 4                      | -3.28               | 4.08           | -11.28 to 4.73           |
| 8                      | 2.6                 | 4.08           | -5.40 to 10.60           |
| 12                     | 0.83                | 4.08           | -7.18 to 8.83            |
| <b>Intercept</b>       | 68.77               | 2.89           | 63.11 to 74.43           |
| <i>Random Effect</i>   |                     |                |                          |
| Variable               | Variance            | Standard Error | 95% Confidence Intervals |
| Intercept              | 83.34               | 19.64          | 52.51 to 132.27          |
| <b>C</b>               |                     |                |                          |
| Model 8 eVF STAT1i-lip |                     |                |                          |
| <i>Fixed Effects</i>   |                     |                |                          |
| Variable               | $\beta$ coefficient | Standard Error | 95% Confidence Intervals |
| <b>Time (weeks)</b>    |                     |                |                          |
| 0                      | Reference           | Reference      | Reference                |
| 4                      | 0.40                | 2.13           | -3.78 to 4.58            |
| 8                      | <b>5.89</b>         | <b>2.13</b>    | <b>1.71 to 10.07</b>     |
| 12                     | <b>-10.16</b>       | <b>2.13</b>    | <b>-14.34 to -5.98</b>   |
| <b>Intercept</b>       | 73.12               | 1.55           | 70.06 to 76.15           |
| <i>Random Effect</i>   |                     |                |                          |
| Variable               | Variance            | Standard Error | 95% Confidence Intervals |
| Intercept              | 22.72               | 6.18           | 13.33 to 38.73           |
| <b>D</b>               |                     |                |                          |
| Model 9 eVF STAT6i-lip |                     |                |                          |
| <i>Fixed Effects</i>   |                     |                |                          |
| Variable               | $\beta$ coefficient | Standard Error | 95% Confidence Intervals |
| <b>Time (weeks)</b>    |                     |                |                          |
| 0                      | Reference           | Reference      | Reference                |
| 4                      | 1.27                | 3.45           | -5.49 to 8.01            |
| 8                      | 6.20                | 3.45           | -0.55 to 12.96           |
| 12                     | -0.68               | 3.45           | -7.43 to 6.07            |
| <b>Intercept</b>       | 67.34               | 2.63           | 62.18 to 72.50           |
| <i>Random Effect</i>   |                     |                |                          |
| Variable               | Variance            | Standard Error | 95% Confidence Intervals |
| Intercept              | 59.35               | 16.15          | 34.82 to 101.19          |

**Supplemental table 9. Linear mixed effects model with pairwise comparisons, eVF.**

Model 10 eVF

| <i>Fixed Effects</i>                                                 |                                       |                       |                                 |
|----------------------------------------------------------------------|---------------------------------------|-----------------------|---------------------------------|
| <b>Variable</b>                                                      | <b><math>\beta</math> coefficient</b> | <b>Standard Error</b> | <b>95% Confidence Intervals</b> |
| <b>Treatment</b>                                                     |                                       |                       |                                 |
| Veh-Lip                                                              | Reference                             | Reference             | Reference                       |
| Clod-Lip                                                             | <b>-11.14</b>                         | <b>3.70</b>           | <b>-18.40 to -3.89</b>          |
| Stat1i-Lip                                                           | -6.81                                 | 3.70                  | -14.06 to 0.45                  |
| Stat6i-Lip                                                           | <b>-12.58</b>                         | <b>3.70</b>           | <b>-19.83 to -5.32</b>          |
| <b>Time (weeks)</b>                                                  |                                       |                       |                                 |
| 0                                                                    | Reference                             | Reference             | Reference                       |
| 4                                                                    | <b>-9.18</b>                          | <b>3.62</b>           | <b>-16.27 to -2.09</b>          |
| 8                                                                    | <b>-8.23</b>                          | <b>3.62</b>           | <b>-15.32 to -1.14</b>          |
| 12                                                                   | <b>-12.93</b>                         | <b>3.62</b>           | <b>-20.02 to -5.84</b>          |
| <b>Treatment x Time</b>                                              |                                       |                       |                                 |
| Clod-Lip (4wk)                                                       | 5.90                                  | 5.12                  | -4.13 to 15.93                  |
| Clod-Lip (8wk)                                                       | <b>10.83</b>                          | <b>5.12</b>           | <b>0.80 to 20.85</b>            |
| Clod-Lip (12wk)                                                      | <b>13.75</b>                          | <b>5.12</b>           | <b>3.73 to 23.79</b>            |
| Stat1i-Lip (4wk)                                                     | 9.58                                  | 5.12                  | -0.45 to 19.61                  |
| Stat1i-Lip (8wk)                                                     | <b>14.12</b>                          | <b>5.12</b>           | <b>4.09 to 24.14</b>            |
| Stat1i-Lip (12wk)                                                    | 2.77                                  | 5.12                  | -7.26 to 12.80                  |
| Stat6i-Lip (4wk)                                                     | <b>10.45</b>                          | <b>5.12</b>           | <b>0.42 to 20.47</b>            |
| Stat6i-Lip (8wk)                                                     | <b>14.43</b>                          | <b>5.12</b>           | <b>4.40 to 24.46</b>            |
| Stat6i-Lip (12wk)                                                    | <b>12.26</b>                          | <b>5.12</b>           | <b>2.23 to 22.28</b>            |
| <b>Intercept</b>                                                     | 79.91                                 | 2.62                  | 74.78 to 85.04                  |
| <i>Random Effects</i>                                                |                                       |                       |                                 |
| <b>Variable</b>                                                      | <b>Variance</b>                       | <b>Standard Error</b> | <b>95% Confidence Intervals</b> |
| Intercept (all)                                                      | 68.53                                 | 8.10                  | 54.36 to 86.40                  |
| Intercept (by group)                                                 | 3.10                                  | 5.10                  | -6.89 to 13.09                  |
| Exchangeable covariance matrix used to control for repeated measures |                                       |                       |                                 |
